# Supplementary material
Source: Springer Nature journal article supplement (https://www.springermedizin.de/resource/supplementary/13012_2012_575_MOESM4_ESM.pdf/9630474)
Supplement: MOESM4 [file 9630474]

# Standards of Reporting Trials (CONSORT) 2010 statement

## Enrollment

Assessed for eligibility (124)

Excluded (n= 92)

- ◆ Not meeting inclusion criteria (n=8)
- ◆ Declined to participate (n=81)
- ◆ Other reasons (n=3)

Randomized (32 practices)

## Allocation

**Allocated to intervention** (n=16 practices)

Solo practice (n=3)

2-4 GPs (n=6)

More than 5 GPs (n=7)

**Allocated to late intervention** (n=16 practices)

Solo practice (n=4)

2-4 GPs (n=4)

More than 5 GPs (n=8)
